# Supplementary material
Source: PubMed Central journal article supplement (PMC4325667)
Supplement: supp_mxu001_mxu001supp.pdf [file supp_mxu001_mxu001supp.pdf]

**WEB TABLE 1**

**Military Service, Deployments, and Exposures in Relation to Amyotrophic Lateral  
Sclerosis Etiology and Survival**

**John D. Beard and Freya Kamel**

Correspondence to Freya Kamel, Epidemiology Branch, National Institute of Environmental Health Sciences, P.O. Box 12233, Mail Drop A3-05, 111 T.W. Alexander Drive, Research Triangle Park, NC 27709 (e-mail: [kamel@niehs.nih.gov](mailto:kamel@niehs.nih.gov)).

**Web Table 1.** Studies of the Association Between Military Service, Deployments, or Exposures and ALS/MND Etiology Published Through the End of 2013 That Did Not Have at Least 5 Exposed Cases or Controls or Did Not Report an Effect Measure Estimate or *P* Value for the Association(s) of Interest

| First Author, Year (Reference No.) | Study Population                                                                                             | Sample Size                                                                                                            | Outcome                           | Exposure                | Matching or Adjustment Factors                     | Statistical Analysis                                        | Result                                                                                                    |
|------------------------------------|--------------------------------------------------------------------------------------------------------------|------------------------------------------------------------------------------------------------------------------------|-----------------------------------|-------------------------|----------------------------------------------------|-------------------------------------------------------------|-----------------------------------------------------------------------------------------------------------|
| <i>Cohort Studies</i>              |                                                                                                              |                                                                                                                        |                                   |                         |                                                    |                                                             |                                                                                                           |
| Gibberd, 1980 (1)                  | British WWII ex-prisoners of war in the Far East followed since 1945                                         | 4,684 ex-prisoners of war, 1 MND case                                                                                  | MND                               | NA                      | None                                               | Prevalence                                                  | Prevalence = 21.35 per 100,000 (vs. 7–12 per 100,000 in the general populations of the U.S. and the U.K.) |
| Thomas, 1990 (2)                   | Male U.S. Army Chemical Corps Vietnam veterans followed from date last served in Vietnam until death or 1987 | 854 veterans (16,200 person-years), 3 deceased nervous system diseases cases (2 ALS, 1 MS)                             | Nervous system disease death rate | NA                      | Age, race, calendar period                         | SMR (using the entire U.S. male population as the standard) | SMR = 4.16, <i>P</i> > 0.05                                                                               |
| <i>Case-Control Studies</i>        |                                                                                                              |                                                                                                                        |                                   |                         |                                                    |                                                             |                                                                                                           |
| Gresham, 1986 (3)                  | Center for Neurologic Center in San Diego, California, January–May 1985                                      | 66 cases; 66 controls (friends and neighbors of ALS cases, but not former coworkers, free of known neurologic disease) | ALS                               | Military experience     | Individually matched on age, sex                   | McNemar’s test for matched pairs, odds ratio                | <i>n</i> = 23 cases, 22 controls, no OR shown                                                             |
| Chio, 1991 (4)                     | Italy, 1960–1982                                                                                             | 512 cases; 512 hospital controls with other neurological diseases                                                      | MND                               | Occupation as a soldier | Age, sex, province of residence, date of admission | McNemar’s test for matched pairs, odds ratio                | <i>n</i> = 2 cases, 4 controls, OR = 0.5; 95% CI: 0, 2.2                                                  |
| Gunnarsson, 1991 (5)               | Sweden, 1970–1983                                                                                            | 1,375 deceased cases; 1,434 living controls from an age-stratified random sample of native Swedes                      | ALS death                         | Armed forces occupation | Age                                                | Mantel-Haenszel odds ratio                                  | Males: <i>n</i> = 4 deceased cases, OR = 0.7                                                              |

| First Author, Year<br>(Reference No.) | Study<br>Population                                                       | Sample Size                                                                                                            | Outcome | Exposure                                                     | Matching or<br>Adjustment Factors                                                                                                         | Statistical Analysis                                          | Result                                                                                                        |
|---------------------------------------|---------------------------------------------------------------------------|------------------------------------------------------------------------------------------------------------------------|---------|--------------------------------------------------------------|-------------------------------------------------------------------------------------------------------------------------------------------|---------------------------------------------------------------|---------------------------------------------------------------------------------------------------------------|
| Sutedja, 2007 (6)                     | University<br>Medical Center<br>Utrecht, The<br>Netherlands,<br>2001–2005 | 364 cases, 392<br>controls<br>(acquaintances of ALS<br>cases who were not<br>spouses, partners, or<br>blood relatives) | ALS     | Armed forces<br>occupation<br><i>Cross-Sectional Studies</i> | Matched on age, sex;<br>adjusted for age,<br>cigarette smoking,<br>level of education,<br>major occupation<br>group; stratified by<br>sex | Multiple logistic<br>regression                               | Males: $n = 4$ cases, 5<br>controls, OR = 0.9;<br>95% CI = 0.2, 3.4;<br>females: $n = 0$ cases, 0<br>controls |
| Holloway, 1986 (7)                    | Scotland, 1961–<br>1981                                                   | 161 cases                                                                                                              | MND     | Armed forces<br>occupation                                   | None                                                                                                                                      | Chi-square test to<br>compare observed<br>and expected counts | Males: $n = 1$ case<br>(1.2% vs. 0.2% in the<br>general population),<br>no $P$ value shown                    |

Abbreviations: ALS, amyotrophic lateral sclerosis; CI, confidence interval; MND, motor neuron disease; MS, multiple sclerosis; NA, not available; OR, odds ratio; SMR, standardized mortality ratio; U.K., United Kingdom; U.S., United States; WWII, World War II.

## REFERENCES

1. Gibberd FB, Simmonds JP. Neurological disease in ex-Far-East prisoners of war. *Lancet*. 1980;2(8186):135–137.
2. Thomas TL, Kang HK. Mortality and morbidity among Army Chemical Corps Vietnam veterans: a preliminary report. *Am J Ind Med*. 1990;18(6):665–673.
3. Gresham LS, Molgaard CA, Golbeck AL, et al. Amyotrophic lateral sclerosis and occupational heavy metal exposure: a case-control study. *Neuroepidemiology*. 1986;5(1):29–38.
4. Chio A, Meineri P, Tribolo A, et al. Risk factors in motor neuron disease: a case-control study. *Neuroepidemiology*. 1991;10(4):174–184.
5. Gunnarsson LG, Lindberg G, Soderfeldt B, et al. Amyotrophic lateral sclerosis in Sweden in relation to occupation. *Acta Neurol Scand*. 1991;83(6):394–398.
6. Sutedja NA, Veldink JH, Fischer K, et al. Lifetime occupation, education, smoking, and risk of ALS. *Neurology*. 2007;69(15):1508–1514.
7. Holloway SM, Mitchell JD. Motor neurone disease in the Lothian Region of Scotland 1961–81. *J Epidemiol Community Health*. 1986;40(4):344–350.
